# Supplementary material
Source: publisher figshare collection journal article supplement (https://sage.figshare.com/ndownloader/files/20186253)
Supplement: Supplementary file 1 [file 20186253]

## Supplemental Appendix 1: Survey questions

- 1) In general, how satisfied were you with your experience as an Edmondson Intern?
  - Highly satisfied
  - Satisfied
  - Neutral
  - Dissatisfied
  - Highly dissatisfied
- 2) How satisfied were you with the research component of your experience as an Edmondson Intern?
  - Highly satisfied
  - Satisfied
  - Neutral
  - Dissatisfied
  - Highly dissatisfied
- 3) How satisfied were you with clinical shadowing experiences as an Edmondson Intern?
  - Highly satisfied
  - Satisfied
  - Neutral
  - Dissatisfied
  - Highly dissatisfied
- 4) Please indicate if you included your experience as an Edmondson Intern on applications for any of the following professional opportunities (Select all that apply):
  - Healthcare job opportunity
  - Research opportunity
  - Graduate or professional school
  - Volunteer program
  - Other
  - I have not yet included this on an application
  - I do not intend to include this on an application
- 5) Did an interviewer for any professional opportunities mentioned above ever ask about your experience as an Edmondson intern?
  - Yes
  - No
  - I have not had any interviews.
- 6) Were you accepted to any of the professional opportunities that you applied for?
  - Yes
  - No
  - Not applicable – I have not applied or been interviewed for any opportunities.
- 7) Rate your agreement with the following statement: My experience as an Edmondson Intern was perceived as an advantageous part of my application by others.
  - Strongly agree

Agree  
Neutral  
Disagree  
Strongly disagree  
Not applicable

- 8) Rate your agreement with the following statement: I consider my experience as an Edmondson Intern to be an important part of my career growth/pathway.

Strongly agree  
Agree  
Neutral  
Disagree  
Strongly disagree  
Not applicable

- 9) Rate your agreement with the following statement: My experience as an Edmondson Intern prompted me to strongly consider pathology or laboratory medicine as a career choice.

Strongly agree  
Agree  
Neutral  
Disagree  
Strongly disagree  
Not applicable

- 10) Prior to your experience as an Edmondson Intern, did you have any firsthand experience with any of the following (Select all that apply):

Pathologist  
Clinical laboratory scientist  
Research scientist  
Medical doctor or surgeon  
Clinical laboratory  
Research laboratory  
Academic health center

- 11) Please check the choice below which best describes the highest degree you have received to date:

Some college but no degree  
Associate degree – occupational or vocational program  
Associate degree – academic program  
Bachelor's degree (for example: BA, AB, BS)  
Bachelor's of Nursing or Bachelor's degree + RN  
Master's degree (for example: MA, MS, MEng, MSW, MBA)  
Professional school degree (for example: MD, DDS, DVM, JD, LLD)  
Graduate school degree (for example: PhD, EdD)  
Combination of professional and doctoral degree (for example: MD/PhD, DVM/PhD, DDS/PhD, MD/EdD)

- 12) Please check any educational program that you are currently enrolled in to attain these degree:

Some college but no degree

Associate degree – occupational or vocational program  
Associate degree – academic program  
Bachelor's degree (for example: BA, AB, BS)  
Bachelor's of Nursing or Bachelor's degree + RN  
Master's degree (for example: MA, MS, MEng, MSW, MBA)  
Professional school degree (for example: MD, DDS, DVM, JD, LLD)  
Graduate school degree (for example: PhD, EdD)  
Combination of professional and doctoral degree (for example: MD/PhD, DVM/PhD, DDS/PhD, MD/EdD)

13) What year did you participate as an Edmondson intern?

2003-2007

2008-2012

2013-2017

14) Please indicate your gender

Male

Female

Other

I choose not to identify

15) Do you identify as a member of an under-represented ethnic or racial minority?

Yes

No

16) Choose the type of educational institution you attended as an Edmondson intern.

University of California

California State University

Public university outside in another state

Private university or college in California

Private university or college in another state

Community college in California

Community college in another state

17) Please share any reflections from your Edmondson Intern experience, and how you have used or plan to use this experience.

18) Other comments.
